# Supplementary material for: Individual differences in beta-band oscillations predict motor-inhibitory control
Source: Frontiers journal article supplement (doi:10.3389/fnins.2023.1131862), 2023-03-01
Supplement: Table_1.XLSX [file Table_1.XLSX]

## Sheet: demographaic and SST measures
Subject	Age, years	Sex (1=male, 2=female)	Accuracy of "go"	RT of "go"	Accuracy of "nogo"	P(respond|signal)	RT of "unseccessful stop"	SSRT	Mean SSD	Go ommission
Sub01	20	2	0.986111	489.208	0.975	0.5	407.8	234	225	0.0138889
Sub02	21	1	0.875	377.2	0.7	0.3625	322.196	228.625	89.375	0.00277778
Sub03	21	2	0.966667	518.638	1	0.5	442.25	152.388	366.25	0.0194444
Sub04	20	2	0.986111	435.808	1	0.4875	374.878	242.75	171.25	0
Sub05	22	2	0.836111	714.07	1	0.5375	669.027	248.75	546.25	0.161111
Sub06	25	1	0.986111	364.792	0.9	0.425	351.478	268.625	84.375	0.00277778
Sub07	21	2	1	418.542	0.95	0.475	360.69	266.5	127.5	0
Sub08	22	1	0.952778	362.032	0.95	0.4625	334.651	231.75	106.25	0
Sub09	22	2	1	433.972	1	0.4875	385.585	211.5	207.5	0
Sub10	21	2	0.997222	428.454	0.975	0.4875	393.78	275.5	142.5	0.00277778
Sub11	21	1	0.983333	453.189	1	0.5	382.725	220.5	217.5	0.0111111
Sub12	22	1	1	440.6	0.975	0.4875	411.829	243	185	0
Sub13	20	1	0.997222	480.326	1	0.5	443.8	200	255	0.00277778
Sub14	21	2	0.991667	469.84	1	0.5125	398.333	250.25	198.75	0.00555556
Sub15	24	2	0.975	371.063	0.875	0.375	339.78	256.75	91.25	0
Sub16	20	2	0.941667	393.844	0.875	0.4	318.75	250	105	0.0138889
Sub17	21	2	0.994444	405.785	0.875	0.475	372.881	231.5	157.5	0
Sub18	22	1	0.997222	503.758	0.975	0.5125	466.308	221.75	276.25	0
Sub19	22	2	0.952778	679.781	1	0.525	652.316	189.5	512.5	0.0416667
Sub20	20	2	0.919444	696.378	1	0.55	663.167	242.75	486.25	0.075
Sub21	20	2	0.988889	441.272	1	0.475	391.881	251.375	160.625	0.00277778
Sub22	25	2	0.997222	400.039	0.775	0.475	377.405	241.125	141.875	0
Sub23	22	2	0.952778	568.134	1	0.4875	463.39	229	315	0.0472222
Sub24	22	2	0.961111	507.549	1	0.4875	432.854	255.25	243.75	0.0333333
Sub25	25	1	0.991667	381.44	0.925	0.4	358.021	271.5	87.5	0
Sub26	21	2	0.983333	359.537	1	0.35	323.538	256.25	78.75	0.00277778
Sub27	20	2	0.980556	388.408	0.975	0.4125	361.298	270.5	92.5	0.00277778
Sub28	22	2	0.891667	333.981	0.85	0.2375	304.59	213.875	73.125	0
Sub29	22	2	0.983333	543.136	0.975	0.5	480.925	306.5	217.5	0.0111111
Sub30	21	2	0.994444	406.835	0.975	0.4875	371.098	242.5	152.5	0

## Sheet: Power
Subject	Left motor cortex	Left inferior frontal cortex	Right motor cortex	Right inferior frontal cortex	Left somatosensory cortex	Right somatosensory cortex
Sub01	0.39505	0.479498	0.42246	0.488168	0.388402	0.35738
Sub02	0.364706	0.50294	0.412655	0.511403	0.492541	0.564904
Sub03	0.402679	0.497259	0.33053	0.461268	0.409346	0.308897
Sub04	0.845626	0.745332	0.608602	0.760318	0.550014	0.639609
Sub05	0.681569	0.808462	0.660292	0.777041	0.662364	0.602849
Sub06	0.655985	0.569094	0.727805	0.690901	0.730524	0.807379
Sub07	0.66954	0.719637	0.665819	0.735887	0.649817	0.652081
Sub08	0.445291	0.620284	0.496902	0.610644	0.597369	0.647244
Sub09	0.54419	0.63423	0.402552	0.474605	0.748509	0.533788
Sub10	0.644796	0.809262	0.652065	0.826802	0.833682	0.820933
Sub11	0.390054	0.472619	0.341235	0.4619	0.394491	0.47571
Sub12	0.792321	0.635022	0.861959	0.779135	0.891539	1.03896
Sub13	0.718435	0.691696	0.783913	0.786122	0.773443	0.821665
Sub14	0.686392	0.379172	0.866639	0.75144	0.943031	1.14108
Sub15	0.689389	0.669283	0.520235	0.651389	0.794068	0.662522
Sub16	0.584265	0.726982	0.671842	0.766822	0.512634	0.598615
Sub17	0.486125	0.631093	0.481824	0.604195	0.658402	0.604224
Sub18	0.615054	0.580284	0.566263	0.567188	0.571941	0.582793
Sub19	0.450171	0.505328	0.390999	0.465793	0.560234	0.390669
Sub20	0.534837	0.435828	0.674932	0.7197	0.580125	0.63087
Sub21	0.660817	0.453337	0.647218	0.525184	0.668061	0.699186
Sub22	0.763921	0.640451	0.842677	0.706616	0.891494	1.07227
Sub23	0.566765	0.51972	0.582637	0.56792	0.599682	0.615383
Sub24	1.02959	0.893917	1.04946	0.947898	1.08165	1.07225
Sub25	0.540166	0.392857	0.565388	0.621804	0.566856	0.567128
Sub26	0.732986	0.647491	0.705882	0.576893	0.792079	0.725438
Sub27	1.14999	1.20319	1.11149	1.18999	0.843002	0.9583
Sub28	0.322231	0.484109	0.292731	0.433721	0.402704	0.264534
Sub29	0.695344	0.751666	0.672421	0.742817	0.655108	0.618164
Sub30	0.402994	0.512342	0.390021	0.514197	0.390759	0.454751

## Sheet: Coherence
Subject	'RIF-LIF'	'RIF-RM'	'RIF-LM'	'RIF-RS'	'RIF-LS'	'LIF-RM'	'LIF-LM'	'LIF-RS'	'LIF-LS'	'RM-LM'	'RM-RS'	'RM-LS'	'LM-RS'	'LM-LS'	'RS-LS'
Sub01	0.484875	1.04693	0.324181	0.597259	0.109697	0.391114	0.935634	0.202687	0.366642	0.292057	0.835495	0.090091	0.160139	0.624058	0.073181
Sub02	0.106857	0.654125	0.082549	0.28294	0.088011	0.056065	0.677233	0.055124	0.341268	0.06789	0.579106	0.080174	0.080345	0.711855	0.163725
Sub03	0.211759	0.752872	0.091702	0.139823	0.019858	0.090092	0.937411	0.037487	0.295212	0.0286	0.416404	0.027226	0.071475	0.548088	0.029368
Sub04	0.363683	1.02835	0.265559	0.810147	0.186734	0.313204	1.09754	0.278674	0.688672	0.277907	1.47961	0.224994	0.27347	1.46332	0.239706
Sub05	0.682747	1.14737	0.507961	0.842599	0.470409	0.50148	1.03625	0.454024	0.803203	0.459356	1.38125	0.422328	0.424536	1.17003	0.463072
Sub06	0.507239	1.27995	0.560153	0.842589	0.473928	0.566924	1.16327	0.482881	0.767944	0.695965	1.17275	0.620033	0.615916	1.03614	0.704391
Sub07	0.574701	0.714668	0.528854	0.64597	0.47321	0.514795	0.984332	0.519565	0.778882	0.585046	1.2052	0.537519	0.5907	1.16275	0.638765
Sub08	0.079539	0.7404	0.032965	0.281951	0.050779	0.021607	0.697996	0.048426	0.389478	0.018391	0.440239	0.030124	0.07033	0.79292	0.203576
Sub09	0.184336	0.963271	0.061871	0.444233	0.042126	0.094676	0.904809	0.046543	0.506802	0.030442	0.707736	0.025633	0.021663	0.756548	0.054481
Sub10	0.37753	1.02147	0.263237	0.379388	0.103677	0.302078	0.761241	0.106063	0.322785	0.250213	0.609839	0.097925	0.106468	0.634691	0.075285
Sub11	0.102897	1.06326	0.044976	0.359804	0.030881	0.062102	0.890004	0.045835	0.354306	0.037791	0.579801	0.029831	0.038125	0.676295	0.095996
Sub12	0.385805	1.44175	0.475935	0.824555	0.330963	0.466648	1.00788	0.34064	0.570751	0.64079	1.16506	0.475695	0.519956	0.946215	0.529095
Sub13	0.121096	1.04586	0.205012	0.489653	0.142974	0.176204	0.956297	0.131553	0.484309	0.305306	0.819041	0.234507	0.233531	0.855673	0.242
Sub14	0.155282	1.10028	0.155047	0.514758	0.103534	0.208546	0.967242	0.130404	0.558755	0.250895	1.07887	0.216829	0.195134	1.03753	0.262541
Sub15	0.355304	0.683775	0.119413	0.203384	0.073142	0.106069	0.93797	0.054442	0.52768	0.044661	0.710217	0.048924	0.063579	1.28367	0.118906
Sub16	0.479321	1.0919	0.390704	0.654462	0.258004	0.399106	1.04713	0.3167	0.538643	0.37062	1.27239	0.27232	0.348384	1.02158	0.322307
Sub17	0.327789	0.672366	0.08004	0.179926	0.0228	0.079015	0.704493	0.021305	0.239056	0.024393	0.491846	0.043033	0.061071	0.62819	0.025249
Sub18	0.307403	1.16996	0.424175	0.735716	0.396025	0.371073	0.720107	0.293757	0.481143	0.579287	1.08492	0.545656	0.473901	0.947765	0.565221
Sub19	0.220564	0.782614	0.131011	0.297434	0.039818	0.085326	1.03561	0.049666	0.262567	0.056702	0.407056	0.023556	0.046591	0.521834	0.106677
Sub20	0.064395	0.735467	0.194174	0.515837	0.222474	0.134051	0.498184	0.124641	0.218215	0.460068	1.1586	0.545419	0.492534	0.773583	0.807008
Sub21	0.281056	1.05779	0.293054	0.735729	0.271654	0.299122	0.775258	0.256148	0.757035	0.383222	1.172	0.368893	0.340401	1.3581	0.368742
Sub22	0.31246	1.00984	0.312597	0.557154	0.288946	0.28176	0.908918	0.203509	0.664762	0.384413	1.19627	0.4047	0.342372	1.74167	0.427325
Sub23	0.449559	1.2311	0.648274	0.969771	0.622711	0.553411	0.923007	0.543039	0.721574	0.897073	1.52498	0.881424	0.931375	1.51643	0.997477
Sub24	0.412373	1.06166	0.36686	0.679879	0.30294	0.410211	1.20321	0.330987	0.675575	0.437993	0.984371	0.386752	0.381581	1.02673	0.456742
Sub25	0.116509	1.01506	0.242352	0.633019	0.19294	0.160069	0.582765	0.133111	0.261624	0.384444	1.06004	0.335468	0.335248	0.785722	0.376195
Sub26	0.345292	0.80686	0.340286	0.308432	0.252997	0.342556	0.847077	0.179547	0.554523	0.480658	0.688659	0.427933	0.34356	1.36645	0.427675
Sub27	1.05361	1.28551	0.936987	0.843524	0.853186	0.869587	1.12097	0.675941	0.84464	1.00744	1.1402	1.02547	0.763618	0.991329	1.29354
Sub28	0.186265	1.07289	0.086857	0.378766	0.024558	0.111726	0.927808	0.061678	0.278989	0.0787	0.909688	0.02572	0.098306	0.774674	0.092189
Sub29	1.0764	1.65129	1.07982	1.09308	0.870949	1.11071	1.58993	0.855021	1.14179	1.17372	1.43261	0.951266	0.948543	1.45756	0.881896
Sub30	0.293077	1.13314	0.160283	0.390133	0.19801	0.292491	0.673003	0.124549	0.428568	0.193103	0.675824	0.280894	0.154118	0.929486	0.362685

## Sheet: Global efficiency
Subject	Global efficiency at each threshold										AUC of Global efficiency
	0.05	0.1	0.15	0.2	0.25	0.30	0.35	0.40	0.45	0.5
Sub01	0.147	0.233	0.291	0.32	0.337	0.345	0.355	0.36	0.36	0.361	0.143
Sub02	0.156	0.242	0.285	0.302	0.313	0.316	0.317	0.318	0.318	0.318	0.132
Sub03	0.171	0.258	0.294	0.309	0.315	0.317	0.32	0.32	0.32	0.32	0.135
Sub04	0.125	0.201	0.308	0.347	0.372	0.385	0.398	0.405	0.407	0.409	0.154
Sub05	0.136	0.271	0.34	0.387	0.421	0.451	0.472	0.491	0.502	0.511	0.183
Sub06	0.185	0.26	0.307	0.35	0.388	0.412	0.424	0.433	0.44	0.445	0.166
Sub07	0.12	0.258	0.335	0.403	0.432	0.453	0.476	0.49	0.502	0.512	0.183
Sub08	0.197	0.291	0.33	0.356	0.369	0.378	0.383	0.386	0.386	0.386	0.159
Sub09	0.16	0.247	0.283	0.305	0.315	0.323	0.324	0.325	0.325	0.327	0.135
Sub10	0.12	0.242	0.288	0.326	0.343	0.354	0.362	0.367	0.379	0.38	0.146
Sub11	0.193	0.263	0.307	0.326	0.339	0.343	0.344	0.347	0.347	0.347	0.144
Sub12	0.151	0.236	0.281	0.312	0.344	0.353	0.36	0.363	0.364	0.364	0.143
Sub13	0.173	0.248	0.294	0.317	0.327	0.333	0.334	0.334	0.334	0.334	0.139
Sub14	0.143	0.26	0.308	0.331	0.34	0.343	0.343	0.343	0.345	0.348	0.143
Sub15	0.179	0.263	0.322	0.347	0.365	0.383	0.388	0.39	0.391	0.391	0.157
Sub16	0.181	0.275	0.329	0.364	0.396	0.419	0.432	0.439	0.444	0.448	0.171
Sub17	0.152	0.266	0.301	0.316	0.325	0.33	0.331	0.331	0.331	0.331	0.139
Sub18	0.141	0.216	0.28	0.315	0.336	0.368	0.379	0.385	0.392	0.4	0.147
Sub19	0.114	0.229	0.281	0.3	0.311	0.314	0.314	0.314	0.314	0.314	0.13
Sub20	0.101	0.212	0.27	0.315	0.347	0.363	0.379	0.387	0.392	0.392	0.146
Sub21	0.0984	0.209	0.274	0.312	0.342	0.365	0.385	0.391	0.394	0.398	0.146
Sub22	0.106	0.251	0.31	0.358	0.377	0.402	0.412	0.418	0.421	0.423	0.161
Sub23	0.0716	0.18	0.222	0.292	0.343	0.376	0.425	0.453	0.476	0.49	0.152
Sub24	0.196	0.297	0.359	0.391	0.416	0.43	0.441	0.449	0.455	0.46	0.178
Sub25	0.167	0.242	0.269	0.287	0.3	0.306	0.309	0.314	0.318	0.32	0.129
Sub26	0.135	0.272	0.323	0.355	0.371	0.381	0.387	0.391	0.393	0.394	0.157
Sub27	0.106	0.274	0.362	0.422	0.459	0.5	0.533	0.556	0.58	0.596	0.202
Sub28	0.114	0.249	0.291	0.324	0.342	0.352	0.355	0.362	0.362	0.363	0.144
Sub29	0.172	0.266	0.323	0.389	0.427	0.452	0.479	0.5	0.519	0.548	0.186
Sub30	0.0876	0.22	0.291	0.317	0.335	0.343	0.354	0.358	0.359	0.359	0.14
